# Supplementary material
Source: PubMed Central journal article supplement (PMC4388163)

**Urine Bupropion Levels (ng/mL) listed by Subject by week**  
**If missing "blank"; 1= less than LOQ (1ng/mL)**

| siteid | subjid | study_week | visit_1 | visit_2 | visit_3 | visit_4 |  |
|--------|--------|------------|---------|---------|---------|---------|--|
| 982102 | 0006   | 1          | 1       | 5.6     | 788     |         |  |
| 982102 | 0006   | 2          | 3590    | 1890    | 261     |         |  |
| 982102 | 0006   | 3          | 2370    | 60.6    | 273     |         |  |
| 982102 | 0006   | 4          | 550     | 2380    | 855     |         |  |
| 982102 | 0006   | 5          | 183     | 31.1    | 16.1    |         |  |
| 982102 | 0006   | 6          | 331     | 347     | 141     |         |  |
| 982102 | 0006   | 7          | 49.3    |         |         |         |  |
| 982102 | 0006   | 8          | 1       | 431     | 800     |         |  |
| 982102 | 0006   | 9          | 199     | 1950    |         |         |  |
| 982102 | 0006   | 10         | 2790    | 3030    |         |         |  |
| 982102 | 0006   | 11         | 105     | 543     |         |         |  |
| 982102 | 0006   | 12         | 949     | 56.2    |         |         |  |
| 982102 | 0009   | 1          | 1       |         |         |         |  |
| 982102 | 0009   | 2          | 4920    | 420     |         |         |  |
| 982102 | 0009   | 3          | 303     |         |         |         |  |
| 982102 | 0009   | 4          | 23      | 302     |         |         |  |
| 982102 | 0009   | 6          | 19.1    |         |         |         |  |
| 982102 | 0016   | 1          | 1       | 503     | 231     |         |  |
| 982102 | 0016   | 2          | 134     | 2100    | 2420    | 2750    |  |
| 982102 | 0016   | 3          | 68.3    | 599     | 487     |         |  |
| 982102 | 0016   | 4          | 3960    | 7680    |         |         |  |
| 982102 | 0016   | 5          | 2790    | 723     | 1520    |         |  |
| 982102 | 0016   | 6          | 878     | 1350    | 1310    |         |  |
| 982102 | 0016   | 7          | 245     | 12.3    |         |         |  |
| 982102 | 0016   | 8          | 2480    | 9150    | 5470    |         |  |
| 982102 | 0016   | 9          | 1390    | 148     | 1330    |         |  |
| 982102 | 0016   | 10         | 378     | 485     |         |         |  |
| 982102 | 0016   | 11         | 427     | 103     | 1920    |         |  |
| 982102 | 0016   | 12         | 1590    | 1100    | 718     |         |  |
| 982102 | 0021   | 1          | 1       | 3240    |         |         |  |
| 982102 | 0021   | 2          | 1790    |         |         |         |  |
| 982102 | 0021   | 3          | 1       | 13.7    |         |         |  |
| 982102 | 0021   | 4          | 19.6    | 2380    | 230     |         |  |
| 982102 | 0021   | 5          | 272     | 2120    | 1170    |         |  |
| 982102 | 0021   | 6          | 136     | 66.1    | 1       |         |  |
| 982102 | 0021   | 7          | 6160    | 1730    | 1450    |         |  |
| 982102 | 0021   | 8          | 439     | 129     | 201     |         |  |
| 982102 | 0021   | 9          | 8.06    | 1       | 1       |         |  |
| 982102 | 0021   | 10         | 1       | 1       | 1       |         |  |
| 982102 | 0021   | 11         | 1       |         |         |         |  |
| 982102 | 0021   | 12         | 1       | 1       |         |         |  |
| 982102 | 0039   | 1          | 1       | 475     | 2410    |         |  |
| 982102 | 0039   | 2          | 8360    | 4800    |         |         |  |
| 982102 | 0039   | 3          | 4100    | 3220    | 4210    |         |  |
| 982102 | 0039   | 4          | 6100    | 269     |         |         |  |
| 982102 | 0039   | 5          | 6190    |         |         |         |  |
| 982102 | 0039   | 6          | 7340    | 9840    | 1140    |         |  |
| 982102 | 0039   | 7          | 2620    | 11800   | 5990    |         |  |
| 982102 | 0039   | 8          | 2960    |         |         |         |  |
| 982102 | 0039   | 9          | 587     | 3080    | 10800   |         |  |
| 982102 | 0039   | 10         | 358     |         |         |         |  |

|        |      |    |       |       |       |  |
|--------|------|----|-------|-------|-------|--|
| 982102 | 0039 | 11 | 1140  | 1410  |       |  |
| 982102 | 0039 | 12 | 1300  | 2420  |       |  |
| 982102 | 0052 | 1  | 1     | 444   | 111   |  |
| 982102 | 0052 | 2  | 293   | 2880  | 294   |  |
| 982102 | 0052 | 3  | 55.4  | 60.7  | 315   |  |
| 982102 | 0052 | 4  | 312   | 144   | 344   |  |
| 982102 | 0052 | 5  | 553   | 319   |       |  |
| 982102 | 0052 | 6  | 35.8  | 17    | 153   |  |
| 982102 | 0052 | 7  | 252   | 69.4  |       |  |
| 982102 | 0052 | 8  | 88.3  | 46.3  |       |  |
| 982102 | 0052 | 9  | 8.7   | 43.4  | 78.9  |  |
| 982102 | 0052 | 10 | 143   | 128   |       |  |
| 982102 | 0052 | 11 | 23    | 32.1  |       |  |
| 982102 | 0052 | 12 | 24.9  | 99.3  |       |  |
| 982102 | 0062 | 1  | 1     | 238   | 29.8  |  |
| 982102 | 0062 | 2  | 25.2  | 450   | 74.9  |  |
| 982102 | 0062 | 3  | 924   | 89.9  |       |  |
| 982102 | 0062 | 4  | 131   | 2070  | 1000  |  |
| 982102 | 0062 | 5  | 1500  | 460   |       |  |
| 982102 | 0062 | 6  | 7300  | 578   |       |  |
| 982102 | 0062 | 7  | 2340  | 3350  | 3270  |  |
| 982102 | 0062 | 8  | 61.5  | 1000  |       |  |
| 982102 | 0062 | 9  | 90.9  | 511   | 3570  |  |
| 982102 | 0062 | 10 | 363   | 3240  |       |  |
| 982102 | 0062 | 11 | 1580  | 318   | 794   |  |
| 982102 | 0062 | 12 | 45.4  | 635   |       |  |
| 982103 | 0204 | 1  |       |       |       |  |
| 982103 | 0204 | 3  | 1     |       |       |  |
| 982103 | 0209 | 1  | 1     | 26.7  | 57.5  |  |
| 982103 | 0209 | 2  | 1970  | 1120  |       |  |
| 982103 | 0209 | 3  | 4770  | 1040  |       |  |
| 982103 | 0209 | 4  | 958   | 2930  |       |  |
| 982103 | 0209 | 5  | 1380  | 5420  |       |  |
| 982103 | 0209 | 6  | 1740  | 174   | 325   |  |
| 982103 | 0209 | 7  | 661   | 1980  | 1760  |  |
| 982103 | 0209 | 8  | 142   | 204   | 552   |  |
| 982103 | 0209 | 9  | 14.5  | 4320  | 105   |  |
| 982103 | 0209 | 10 | 1870  | 2420  | 1640  |  |
| 982103 | 0209 | 11 | 1380  | 67.9  |       |  |
| 982103 | 0209 | 12 | 4180  | 424   | 489   |  |
| 982105 | 0600 | 1  | 1     | 1020  | 392   |  |
| 982105 | 0600 | 2  | 131   | 1020  | 695   |  |
| 982105 | 0600 | 3  | 2560  | 3510  | 285   |  |
| 982105 | 0600 | 4  | 3850  | 2790  | 344   |  |
| 982105 | 0600 | 5  | 164   | 3580  | 4230  |  |
| 982105 | 0600 | 6  | 1080  | 201   |       |  |
| 982105 | 0600 | 7  | 1770  | 217   | 1230  |  |
| 982105 | 0600 | 8  | 156   | 569   |       |  |
| 982105 | 0600 | 9  | 88.7  | 490   |       |  |
| 982108 | 1001 | 1  | 1     | 5330  | 22200 |  |
| 982108 | 1001 | 2  | 10100 | 32500 | 6250  |  |
| 982108 | 1001 | 3  | 19200 | 1550  | 2810  |  |
| 982108 | 1001 | 4  | 861   | 302   | 1880  |  |
| 982108 | 1001 | 5  | 876   | 984   | 995   |  |
| 982108 | 1001 | 6  |       | 29.5  | 132   |  |

|        |      |    |      |       |       |      |
|--------|------|----|------|-------|-------|------|
| 982108 | 1001 | 7  | 30   | 43.8  |       |      |
| 982108 | 1001 | 8  | 277  | 113   | 1     |      |
| 982108 | 1001 | 9  | 1    | 1     |       |      |
| 982108 | 1001 | 10 | 1    |       |       |      |
| 982108 | 1001 | 12 |      | 1     | 1     |      |
| 982108 | 1003 | 1  | 1    | 8330  |       |      |
| 982108 | 1003 | 2  | 5380 | 8930  | 4460  |      |
| 982108 | 1003 | 3  | 8380 | 2550  | 717   |      |
| 982108 | 1003 | 4  | 5690 | 7390  | 5980  |      |
| 982108 | 1003 | 5  | 6180 | 3560  | 16200 |      |
| 982108 | 1003 | 6  | 7310 | 10200 | 2150  |      |
| 982108 | 1003 | 7  | 5090 | 5940  | 4210  |      |
| 982108 | 1003 | 8  | 6850 | 1390  | 11600 |      |
| 982108 | 1003 | 9  | 4010 | 6050  |       |      |
| 982108 | 1003 | 10 | 62.9 | 8.88  | 6.32  |      |
| 982108 | 1003 | 11 | 1    | 1     | 1     |      |
| 982108 | 1003 | 12 | 1    | 1     |       |      |
| 982108 | 1010 | 1  | 1    | 1930  |       |      |
| 982108 | 1010 | 2  | 6490 |       |       |      |
| 982108 | 1010 | 3  | 1080 |       |       |      |
| 982108 | 1010 | 4  | 2120 |       |       |      |
| 982108 | 1010 | 6  | 2120 |       |       |      |
| 982108 | 1010 | 8  | 864  | 1370  |       |      |
| 982108 | 1010 | 10 | 632  |       |       |      |
| 982108 | 1010 | 11 | 1390 |       |       |      |
| 982108 | 1010 | 12 |      | 1160  |       |      |
| 982108 | 1026 | 1  | 1    | 7.96  |       |      |
| 982108 | 1026 | 2  | 1    | 1     | 1     |      |
| 982108 | 1026 | 3  | 1    | 1     |       |      |
| 982108 | 1026 | 4  | 1    |       |       |      |
| 982108 | 1026 | 5  | 1    |       |       |      |
| 982108 | 1026 | 6  | 1    |       |       |      |
| 982108 | 1026 | 7  |      | 1     |       |      |
| 982108 | 1026 | 11 | 1    |       |       |      |
| 982108 | 1029 | 1  | 1    | 1180  | 918   |      |
| 982108 | 1029 | 2  | 102  |       |       |      |
| 982108 | 1029 | 3  | 9.48 | 468   | 458   |      |
| 982108 | 1029 | 4  | 463  |       |       |      |
| 982108 | 1029 | 5  | 1070 | 4010  | 1250  |      |
| 982108 | 1031 | 1  | 1    |       |       |      |
| 982108 | 1031 | 2  | 204  | 328   |       |      |
| 982108 | 1031 | 3  | 77.3 | 586   | 36.9  |      |
| 982108 | 1031 | 4  | 68.2 | 190   | 23.3  |      |
| 982108 | 1031 | 5  |      | 1     |       |      |
| 982108 | 1047 | 1  | 1    | 348   |       |      |
| 982108 | 1047 | 2  | 95.8 | 49.6  | 416   |      |
| 982108 | 1047 | 3  | 510  | 765   | 2260  |      |
| 982108 | 1047 | 4  | 221  | 540   | 787   |      |
| 982108 | 1047 | 5  | 92.3 | 305   | 6520  |      |
| 982108 | 1047 | 7  | 1    |       |       |      |
| 982108 | 1047 | 8  | 1560 | 250   |       |      |
| 982108 | 1047 | 9  |      | 1510  | 1030  | 1280 |
| 982108 | 1047 | 10 | 1620 | 701   |       |      |
| 982108 | 1047 | 11 | 983  | 308   |       |      |
| 982108 | 1047 | 12 | 1580 | 125   | 413   |      |

|        |      |    |       |       |       |      |  |
|--------|------|----|-------|-------|-------|------|--|
| 982108 | 1051 | 1  | 1     | 1070  |       |      |  |
| 982108 | 1051 | 2  | 2700  | 54.6  |       |      |  |
| 982108 | 1052 | 1  | 1     | 453   | 917   |      |  |
| 982108 | 1052 | 2  | 2700  | 243   |       |      |  |
| 982108 | 1052 | 3  | 2160  | 238   |       |      |  |
| 982108 | 1052 | 4  | 158   | 111   | 100   |      |  |
| 982108 | 1052 | 5  | 135   |       |       |      |  |
| 982108 | 1052 | 6  |       | 23.6  | 47.8  |      |  |
| 982108 | 1052 | 7  | 336   | 3290  |       |      |  |
| 982108 | 1052 | 8  | 426   | 63.4  | 18.1  |      |  |
| 982108 | 1052 | 9  | 51    | 8.05  |       |      |  |
| 982108 | 1052 | 10 | 5.22  | 110   | 126   |      |  |
| 982108 | 1052 | 11 | 112   | 45.8  | 34.5  |      |  |
| 982108 | 1052 | 12 | 7.92  | 1     | 1     |      |  |
| 982108 | 1053 | 1  | 1     |       |       |      |  |
| 982108 | 1053 | 3  | 1     | 8080  |       |      |  |
| 982108 | 1053 | 4  | 27.8  |       |       |      |  |
| 982108 | 1053 | 5  | 872   |       |       |      |  |
| 982108 | 1053 | 6  |       | 1450  | 18.8  | 8230 |  |
| 982108 | 1053 | 7  | 46.2  | 332   | 112   |      |  |
| 982108 | 1053 | 8  | 15.6  | 1     | 1     |      |  |
| 982108 | 1053 | 9  | 724   | 18.5  | 1     |      |  |
| 982108 | 1053 | 10 | 1     | 1     | 1     |      |  |
| 982108 | 1053 | 11 | 1     | 1     | 1     |      |  |
| 982108 | 1053 | 12 |       | 1     | 1     |      |  |
| 982108 | 1054 | 1  | 1     | 508   | 3590  |      |  |
| 982108 | 1054 | 2  | 8290  | 16400 |       |      |  |
| 982108 | 1054 | 3  | 4340  | 4270  | 1150  |      |  |
| 982108 | 1054 | 4  | 1800  | 6790  | 12200 |      |  |
| 982108 | 1054 | 5  | 23400 | 590   | 4630  |      |  |
| 982108 | 1054 | 6  | 93.1  | 8140  | 70.1  |      |  |
| 982108 | 1054 | 7  | 106   | 16100 | 478   |      |  |
| 982108 | 1054 | 8  | 40.2  | 114   | 556   |      |  |
| 982108 | 1054 | 9  | 144   | 139   | 10700 |      |  |
| 982108 | 1054 | 10 | 362   | 325   | 21.2  |      |  |
| 982108 | 1054 | 11 | 7090  | 185   | 3550  |      |  |
| 982108 | 1054 | 12 | 215   | 33600 | 33800 |      |  |
| 982108 | 1057 | 1  | 1     | 1230  | 4660  |      |  |
| 982108 | 1057 | 2  | 2210  | 1820  | 726   |      |  |
| 982108 | 1057 | 3  | 16400 | 5350  | 2100  |      |  |
| 982108 | 1057 | 4  | 11100 | 2760  |       |      |  |
| 982108 | 1057 | 5  | 2480  | 4260  | 5200  |      |  |
| 982108 | 1057 | 6  | 219   | 1350  | 3860  |      |  |
| 982108 | 1057 | 7  | 732   | 8690  | 1100  |      |  |
| 982108 | 1057 | 8  | 5940  | 1740  | 6860  |      |  |
| 982108 | 1057 | 9  | 45.1  | 5530  | 449   |      |  |
| 982108 | 1057 | 10 | 95.2  | 1650  | 367   |      |  |
| 982108 | 1057 | 11 | 57.5  | 7070  |       |      |  |
| 982108 | 1057 | 12 | 729   | 2890  | 90.7  |      |  |
| 982108 | 1058 | 1  | 1     | 4970  | 725   |      |  |
| 982108 | 1058 | 2  | 845   | 1660  | 8000  |      |  |
| 982108 | 1058 | 3  | 1630  | 2610  |       |      |  |
| 982108 | 1058 | 4  | 10900 | 430   |       |      |  |
| 982108 | 1058 | 5  | 1110  | 2340  | 556   |      |  |
| 982108 | 1058 | 6  | 691   | 293   | 6.79  |      |  |

|        |      |    |      |      |      |      |  |
|--------|------|----|------|------|------|------|--|
| 982108 | 1058 | 7  | 1    |      |      |      |  |
| 982108 | 1058 | 8  | 26.3 | 294  | 763  |      |  |
| 982108 | 1058 | 9  | 2320 | 1130 | 384  |      |  |
| 982108 | 1058 | 10 | 30.1 | 1950 | 67.6 |      |  |
| 982108 | 1058 | 11 | 66.4 | 8.39 |      |      |  |
| 982108 | 1058 | 12 | 783  | 749  | 133  |      |  |
| 982109 | 1201 | 1  | 1    | 2690 | 464  |      |  |
| 982109 | 1201 | 2  | 358  | 3580 |      |      |  |
| 982109 | 1201 | 3  | 1430 |      |      |      |  |
| 982109 | 1201 | 4  | 1780 | 10.4 |      |      |  |
| 982109 | 1201 | 5  | 402  | 1180 |      |      |  |
| 982109 | 1201 | 6  | 145  |      |      |      |  |
| 982109 | 1202 | 1  | 1    | 747  |      |      |  |
| 982109 | 1202 | 2  | 2870 |      |      |      |  |
| 982109 | 1202 | 3  | 297  | 1610 |      |      |  |
| 982109 | 1202 | 4  | 1100 | 3710 |      |      |  |
| 982109 | 1202 | 5  | 1700 | 640  |      |      |  |
| 982109 | 1202 | 6  | 590  | 903  | 96.4 |      |  |
| 982109 | 1202 | 7  | 1480 | 80.8 |      |      |  |
| 982109 | 1202 | 8  | 88.7 | 3720 |      |      |  |
| 982109 | 1202 | 9  | 1270 | 403  |      |      |  |
| 982109 | 1202 | 10 | 26.4 | 35.6 |      |      |  |
| 982109 | 1202 | 11 | 15.3 | 724  | 583  |      |  |
| 982109 | 1202 | 12 | 144  |      |      |      |  |
| 982109 | 1204 | 1  | 1    | 69.2 | 42.5 |      |  |
| 982109 | 1204 | 2  | 1830 | 213  |      |      |  |
| 982109 | 1204 | 3  | 406  | 335  | 291  |      |  |
| 982109 | 1204 | 4  |      |      | 472  |      |  |
| 982109 | 1204 | 5  | 792  | 352  | 433  |      |  |
| 982109 | 1204 | 6  |      | 1940 | 2030 | 147  |  |
| 982109 | 1204 | 7  |      | 276  | 387  |      |  |
| 982109 | 1204 | 8  | 214  | 155  | 639  |      |  |
| 982109 | 1204 | 9  | 480  | 840  | 456  |      |  |
| 982109 | 1204 | 10 | 265  | 180  | 80.9 |      |  |
| 982109 | 1204 | 11 | 47.3 | 245  | 202  |      |  |
| 982109 | 1204 | 12 |      | 1490 | 151  | 59.1 |  |
| 982109 | 1206 | 1  | 1    | 63.3 |      |      |  |
| 982109 | 1206 | 2  | 1560 | 621  | 243  |      |  |
| 982109 | 1206 | 4  | 90.1 |      |      |      |  |
| 982109 | 1206 | 5  | 58.4 | 71.4 |      |      |  |
| 982109 | 1206 | 6  | 21   | 37.2 | 286  |      |  |
| 982109 | 1206 | 7  | 25.4 |      |      |      |  |
| 982109 | 1206 | 8  | 15.3 |      |      |      |  |
| 982109 | 1206 | 9  | 234  |      |      |      |  |
| 982109 | 1206 | 11 | 1    | 1    |      |      |  |
| 982109 | 1206 | 12 |      | 1    | 1    |      |  |
| 982109 | 1211 | 1  | 1    | 2550 |      |      |  |
| 982109 | 1211 | 2  | 170  |      |      |      |  |
| 982109 | 1211 | 3  | 222  | 1    |      |      |  |
| 982109 | 1211 | 5  |      | 7.54 |      |      |  |
| 982109 | 1212 | 1  | 1    | 114  |      |      |  |
| 982109 | 1212 | 2  | 646  | 76.1 | 198  |      |  |
| 982109 | 1212 | 3  | 191  | 234  |      |      |  |
| 982109 | 1212 | 4  | 100  | 88.6 | 24.9 |      |  |
| 982109 | 1212 | 5  | 1    |      |      |      |  |

|        |      |    |      |      |      |  |
|--------|------|----|------|------|------|--|
| 982109 | 1212 | 6  | 1    | 1    |      |  |
| 982109 | 1212 | 7  | 1    | 1    | 1    |  |
| 982109 | 1212 | 8  | 1    | 1    |      |  |
| 982109 | 1212 | 9  | 1    |      |      |  |
| 982109 | 1212 | 10 | 1    | 1    | 1    |  |
| 982109 | 1212 | 11 | 1    | 1    |      |  |
| 982109 | 1212 | 12 | 1    | 1    |      |  |
| 982109 | 1214 | 1  | 1    | 747  | 3530 |  |
| 982109 | 1214 | 2  | 591  |      |      |  |
| 982109 | 1217 | 1  | 35.1 | 28.4 | 13.9 |  |
| 982109 | 1220 | 1  | 1    | 487  |      |  |
| 982109 | 1220 | 2  | 3860 | 4080 | 49.4 |  |
| 982109 | 1220 | 3  | 2320 | 1410 |      |  |
| 982109 | 1220 | 4  | 14.3 |      |      |  |
| 982109 | 1220 | 5  | 51.8 | 678  |      |  |
| 982109 | 1220 | 6  |      | 722  | 4700 |  |
| 982109 | 1220 | 8  | 1    | 115  |      |  |
| 982109 | 1220 | 9  | 134  |      |      |  |
| 982109 | 1220 | 10 | 579  |      |      |  |
| 982109 | 1220 | 11 | 1    |      |      |  |
| 982109 | 1220 | 12 | 1    |      |      |  |
| 982109 | 1222 | 1  | 1    | 1160 | 1020 |  |
| 982109 | 1222 | 2  | 1670 | 275  | 439  |  |
| 982109 | 1222 | 3  | 119  | 294  |      |  |
| 982109 | 1222 | 4  | 3000 | 226  | 118  |  |
| 982109 | 1222 | 5  | 113  | 1190 |      |  |
| 982109 | 1222 | 6  | 1020 | 905  | 167  |  |
| 982109 | 1222 | 7  | 39   | 941  |      |  |
| 982109 | 1222 | 8  | 89.6 |      |      |  |
| 982109 | 1222 | 9  | 133  | 846  | 2030 |  |
| 982109 | 1222 | 10 | 721  | 216  |      |  |
| 982109 | 1222 | 11 | 333  | 183  | 178  |  |
| 982109 | 1222 | 12 | 28.3 | 27.1 |      |  |
| 982109 | 1231 | 1  | 1    | 440  | 844  |  |
| 982109 | 1231 | 2  | 1230 | 189  |      |  |
| 982109 | 1231 | 3  | 598  | 171  |      |  |
| 982109 | 1231 | 4  | 965  | 421  |      |  |
| 982109 | 1231 | 5  | 509  | 1890 |      |  |
| 982109 | 1231 | 6  | 721  |      |      |  |
| 982109 | 1231 | 7  |      | 386  | 563  |  |
| 982109 | 1231 | 8  | 1190 |      |      |  |
| 982109 | 1231 | 10 | 110  |      |      |  |
| 982109 | 1231 | 11 | 266  | 985  |      |  |
| 982109 | 1231 | 12 |      | 268  | 1560 |  |
| 982109 | 1233 | 1  | 1    | 1510 |      |  |
| 982109 | 1233 | 2  | 413  | 677  |      |  |
| 982109 | 1233 | 3  | 713  | 463  |      |  |
| 982109 | 1233 | 5  | 497  |      |      |  |
| 982109 | 1233 | 8  |      | 22.7 |      |  |
| 982110 | 1403 | 1  | 1    | 1    | 1990 |  |
| 982110 | 1403 | 2  | 720  | 928  | 1550 |  |
| 982110 | 1403 | 3  | 457  | 599  | 5140 |  |
| 982110 | 1403 | 4  | 2440 | 4770 | 678  |  |
| 982110 | 1403 | 5  | 7920 | 1190 | 1420 |  |
| 982110 | 1403 | 6  | 80.9 | 1130 | 2900 |  |

|        |      |    |       |       |       |     |  |
|--------|------|----|-------|-------|-------|-----|--|
| 982110 | 1403 | 7  |       | 1     |       |     |  |
| 982110 | 1412 | 1  |       | 26.6  |       |     |  |
| 982110 | 1412 | 2  | 2960  | 3010  | 4920  |     |  |
| 982110 | 1412 | 3  | 945   | 1770  | 232   |     |  |
| 982110 | 1412 | 4  | 5030  | 2350  |       |     |  |
| 982110 | 1412 | 5  | 246   | 1320  | 2780  |     |  |
| 982110 | 1412 | 6  |       | 35.5  | 207   | 364 |  |
| 982110 | 1423 | 1  | 1     | 614   |       |     |  |
| 982110 | 1423 | 2  | 805   | 587   | 761   |     |  |
| 982110 | 1423 | 3  | 554   |       |       |     |  |
| 982110 | 1423 | 4  | 961   | 1020  |       |     |  |
| 982110 | 1423 | 5  | 225   | 2080  |       |     |  |
| 982110 | 1423 | 6  | 149   |       |       |     |  |
| 982111 | 1806 | 1  | 1     | 403   | 1780  |     |  |
| 982111 | 1806 | 2  | 7680  | 819   | 278   |     |  |
| 982111 | 1806 | 3  | 528   | 5300  | 14200 |     |  |
| 982111 | 1806 | 4  | 10300 | 5870  | 3320  |     |  |
| 982111 | 1806 | 5  | 13700 | 445   |       |     |  |
| 982111 | 1806 | 6  | 1360  | 5850  |       |     |  |
| 982111 | 1806 | 7  | 7370  | 575   | 9070  |     |  |
| 982111 | 1806 | 8  | 2500  | 1050  | 541   |     |  |
| 982111 | 1806 | 9  | 1040  | 70.3  |       |     |  |
| 982111 | 1806 | 10 | 1520  | 1290  |       |     |  |
| 982111 | 1806 | 11 | 97.9  | 306   | 104   |     |  |
| 982111 | 1806 | 12 | 1     | 146   |       |     |  |
| 982111 | 1809 | 1  | 1     | 710   | 47.2  |     |  |
| 982111 | 1809 | 2  | 2360  | 1350  | 2820  |     |  |
| 982111 | 1809 | 3  | 13000 | 1420  | 6970  |     |  |
| 982111 | 1809 | 4  | 6410  | 4760  | 3090  |     |  |
| 982111 | 1809 | 5  | 2050  | 1120  |       |     |  |
| 982111 | 1809 | 6  | 5800  | 5130  | 607   |     |  |
| 982111 | 1809 | 8  | 1     |       |       |     |  |
| 982111 | 1809 | 9  | 358   | 602   |       |     |  |
| 982111 | 1809 | 10 | 1580  |       |       |     |  |
| 982111 | 1809 | 11 | 2890  | 3010  |       |     |  |
| 982111 | 1809 | 12 |       | 5.75  | 316   |     |  |
| 982111 | 1814 | 1  | 1     | 495   | 6790  |     |  |
| 982111 | 1814 | 2  | 780   | 155   | 251   |     |  |
| 982111 | 1814 | 3  | 3410  | 37.1  | 3530  |     |  |
| 982111 | 1814 | 4  | 1170  | 1320  |       |     |  |
| 982111 | 1814 | 5  | 11500 | 8290  | 718   |     |  |
| 982111 | 1814 | 6  | 1940  | 2850  | 6120  |     |  |
| 982111 | 1814 | 7  | 2740  | 181   | 3030  |     |  |
| 982111 | 1814 | 8  | 190   | 156   | 818   |     |  |
| 982111 | 1814 | 9  |       | 9020  |       |     |  |
| 982111 | 1814 | 10 | 478   |       |       |     |  |
| 982111 | 1816 | 1  | 1     | 1190  |       |     |  |
| 982111 | 1816 | 2  | 174   | 232   |       |     |  |
| 982111 | 1816 | 3  | 2550  | 19200 |       |     |  |
| 982111 | 1816 | 4  | 530   | 30.6  | 10400 |     |  |
| 982111 | 1816 | 5  | 2030  |       |       |     |  |
| 982111 | 1816 | 6  | 275   | 3940  |       |     |  |
| 982111 | 1816 | 7  | 280   | 19.3  |       |     |  |
| 982111 | 1816 | 8  | 1860  | 337   |       |     |  |
| 982111 | 1816 | 9  | 14.4  |       |       |     |  |

|        |      |    |       |       |       |      |  |
|--------|------|----|-------|-------|-------|------|--|
| 982111 | 1816 | 10 | 1370  | 627   | 3550  |      |  |
| 982111 | 1816 | 11 | 119   | 19.4  |       |      |  |
| 982111 | 1816 | 12 | 10.7  | 6.96  |       |      |  |
| 982111 | 1837 | 1  | 1     | 205   | 4090  |      |  |
| 982111 | 1837 | 2  | 10900 |       |       |      |  |
| 982111 | 1837 | 3  | 3960  |       |       |      |  |
| 982111 | 1837 | 4  | 126   |       |       |      |  |
| 982111 | 1837 | 5  | 1     |       |       |      |  |
| 982111 | 1837 | 8  | 1     | 113   |       |      |  |
| 982111 | 1837 | 9  | 6.05  | 3510  |       |      |  |
| 982111 | 1837 | 10 |       | 51.6  | 1     |      |  |
| 982111 | 1837 | 12 |       | 1     | 1     |      |  |
| 982111 | 1841 | 1  | 1     |       |       |      |  |
| 982111 | 1856 | 1  | 1     | 1290  |       |      |  |
| 982111 | 1856 | 2  | 1     | 134   |       |      |  |
| 982111 | 1856 | 3  | 7.69  | 11.8  |       |      |  |
| 982111 | 1856 | 4  | 1     | 780   |       |      |  |
| 982111 | 1856 | 5  | 251   | 211   |       |      |  |
| 982111 | 1856 | 6  | 7.67  |       |       |      |  |
| 982111 | 1856 | 7  | 1     | 1     | 1     |      |  |
| 982111 | 1856 | 8  | 1     | 1     |       |      |  |
| 982111 | 1856 | 9  | 1     |       |       |      |  |
| 982111 | 1856 | 10 | 1     | 1     |       |      |  |
| 982111 | 1856 | 11 | 1     | 1     | 1     |      |  |
| 982111 | 1856 | 12 |       | 1     | 1     | 1    |  |
| 982111 | 1862 | 1  | 3490  | 487   |       |      |  |
| 982111 | 1862 | 2  | 789   |       |       |      |  |
| 982111 | 1862 | 3  | 2120  | 727   | 978   |      |  |
| 982111 | 1862 | 4  | 194   | 1830  | 129   |      |  |
| 982111 | 1862 | 5  | 50.8  | 6380  |       |      |  |
| 982111 | 1862 | 6  |       | 1000  |       |      |  |
| 982111 | 1888 | 1  | 1     | 17600 |       |      |  |
| 982111 | 1888 | 2  | 1770  | 683   | 1160  |      |  |
| 982111 | 1888 | 3  | 5990  | 9960  | 9500  |      |  |
| 982111 | 1888 | 4  | 3260  | 7400  | 2230  |      |  |
| 982111 | 1888 | 5  | 1850  | 3850  | 14700 |      |  |
| 982111 | 1888 | 6  |       | 3440  | 1     |      |  |
| 982111 | 1888 | 7  | 195   | 8650  |       |      |  |
| 982111 | 1888 | 8  | 6440  | 4460  |       |      |  |
| 982111 | 1888 | 9  | 3270  | 30100 |       |      |  |
| 982111 | 1888 | 10 | 74.6  | 456   |       |      |  |
| 982111 | 1888 | 11 | 8340  | 3360  | 764   |      |  |
| 982111 | 1888 | 12 |       | 73.3  | 1520  | 3470 |  |
| 982111 | 1900 | 1  | 1     | 2770  |       |      |  |
| 982111 | 1900 | 2  | 6.37  |       |       |      |  |
| 982111 | 1902 | 1  | 1     | 3630  | 4780  |      |  |
| 982111 | 1902 | 2  | 242   | 3030  | 11800 |      |  |
| 982111 | 1902 | 3  | 157   | 2840  | 1980  |      |  |
| 982111 | 1902 | 4  | 5570  | 1310  |       |      |  |
| 982111 | 1902 | 5  | 6200  |       |       |      |  |
| 982111 | 1902 | 6  | 1810  | 3910  | 4180  |      |  |
| 982111 | 1902 | 7  | 14200 | 393   |       |      |  |
| 982111 | 1902 | 8  | 5600  | 1060  | 150   |      |  |
| 982111 | 1902 | 9  | 1     | 2190  |       |      |  |
| 982111 | 1902 | 10 | 216   | 226   | 69.4  |      |  |



|        |      |    |       |       |      |      |  |
|--------|------|----|-------|-------|------|------|--|
| 982111 | 1902 | 11 | 1140  | 6780  | 5990 |      |  |
| 982111 | 1902 | 12 |       | 8230  | 1790 |      |  |
| 982111 | 1903 | 1  | 39.2  | 1     | 1250 |      |  |
| 982111 | 1903 | 2  | 2500  |       |      |      |  |
| 982111 | 1903 | 3  | 1880  | 393   |      |      |  |
| 982111 | 1903 | 4  | 6310  | 2300  |      |      |  |
| 982111 | 1903 | 5  | 5310  | 2470  |      |      |  |
| 982111 | 1903 | 6  | 20.4  | 447   | 424  |      |  |
| 982111 | 1903 | 7  |       | 402   | 1    |      |  |
| 982111 | 1903 | 8  | 265   | 226   | 12   |      |  |
| 982111 | 1903 | 9  | 12.1  | 9.14  |      |      |  |
| 982111 | 1903 | 10 | 246   | 295   |      |      |  |
| 982111 | 1903 | 11 | 1     |       |      |      |  |
| 982112 | 1601 | 1  | 1     | 10000 | 4040 |      |  |
| 982112 | 1601 | 2  | 260   |       |      |      |  |
| 982112 | 1601 | 3  | 27.5  | 91.6  |      |      |  |
| 982112 | 1601 | 4  | 1     |       |      |      |  |
| 982112 | 1601 | 5  | 1     | 1     |      |      |  |
| 982112 | 1601 | 6  | 1     |       |      |      |  |
| 982112 | 1601 | 7  | 1     | 1     |      |      |  |
| 982112 | 1601 | 8  | 1     | 1     | 1    |      |  |
| 982112 | 1601 | 9  | 1     | 1     | 1    |      |  |
| 982112 | 1601 | 10 | 1     | 1     | 1    |      |  |
| 982112 | 1601 | 11 | 1     | 1     | 1    |      |  |
| 982112 | 1601 | 12 | 1     | 1     | 1    |      |  |
| 982112 | 1603 | 1  | 1     | 1280  |      |      |  |
| 982112 | 1605 | 1  | 1     | 633   | 2670 |      |  |
| 982112 | 1605 | 2  | 722   |       |      |      |  |
| 982112 | 1605 | 3  | 350   |       |      |      |  |
| 982112 | 1605 | 4  | 1860  | 346   |      |      |  |
| 982112 | 1605 | 5  | 26.5  |       |      |      |  |
| 982112 | 1605 | 6  | 18.7  |       |      |      |  |
| 982112 | 1605 | 7  | 5.19  | 48    |      |      |  |
| 982112 | 1605 | 8  | 5570  | 2660  |      |      |  |
| 982112 | 1609 | 1  | 1     | 1010  | 6460 |      |  |
| 982112 | 1609 | 2  | 4230  | 1730  |      |      |  |
| 982112 | 1609 | 3  | 7220  | 382   | 213  |      |  |
| 982112 | 1609 | 4  | 2610  | 3060  |      |      |  |
| 982112 | 1609 | 5  | 2320  | 1390  |      |      |  |
| 982112 | 1609 | 6  |       | 1390  | 42.3 | 73.5 |  |
| 982112 | 1609 | 7  | 368   | 2620  |      |      |  |
| 982112 | 1609 | 8  | 842   | 11200 | 2370 |      |  |
| 982112 | 1609 | 9  | 448   | 2600  |      |      |  |
| 982112 | 1609 | 10 | 10.5  | 256   | 881  |      |  |
| 982112 | 1609 | 11 | 14400 | 15900 | 281  |      |  |
| 982112 | 1609 | 12 |       | 982   | 300  |      |  |
| 982112 | 1610 | 1  | 1     | 1430  |      |      |  |
| 982112 | 1610 | 2  | 313   |       |      |      |  |
| 982112 | 1610 | 3  | 1     | 122   | 521  |      |  |
| 982112 | 1610 | 4  | 85.4  | 71.4  |      |      |  |
| 982112 | 1610 | 5  | 259   | 707   |      |      |  |
| 982112 | 1614 | 1  | 1     | 349   |      |      |  |
| 982112 | 1614 | 2  | 541   | 1690  |      |      |  |
| 982112 | 1614 | 3  | 496   |       |      |      |  |
| 982112 | 1614 | 4  | 2750  | 272   | 347  |      |  |

|        |      |    |       |       |       |      |  |
|--------|------|----|-------|-------|-------|------|--|
| 982112 | 1614 | 5  | 496   | 868   |       |      |  |
| 982112 | 1614 | 6  | 12.5  | 125   |       |      |  |
| 982112 | 1614 | 7  |       | 50.5  |       |      |  |
| 982112 | 1614 | 8  |       |       |       |      |  |
| 982112 | 1614 | 9  |       |       |       |      |  |
| 982112 | 1614 | 10 | 25.6  | 7.64  |       |      |  |
| 982112 | 1614 | 11 | 232   |       |       |      |  |
| 982112 | 1614 | 12 | 6.9   |       |       |      |  |
| 982112 | 1615 | 1  | 1     | 743   | 1580  |      |  |
| 982112 | 1615 | 2  | 725   | 611   | 267   |      |  |
| 982112 | 1615 | 3  | 622   | 364   |       |      |  |
| 982112 | 1615 | 4  | 73.7  | 262   | 650   |      |  |
| 982112 | 1615 | 5  | 454   |       | 1500  |      |  |
| 982112 | 1615 | 6  |       | 131   | 84    |      |  |
| 982112 | 1615 | 7  | 132   | 249   |       |      |  |
| 982112 | 1615 | 8  | 116   | 126   |       |      |  |
| 982112 | 1615 | 9  | 68.4  |       |       |      |  |
| 982112 | 1615 | 10 | 70.6  | 106   | 74.9  |      |  |
| 982112 | 1615 | 11 | 1470  | 1650  | 445   |      |  |
| 982112 | 1615 | 12 |       | 6.81  | 280   | 1330 |  |
| 982112 | 1620 | 1  | 1     | 3590  | 231   |      |  |
| 982112 | 1620 | 3  | 1500  | 8780  |       |      |  |
| 982112 | 1620 | 4  | 400   | 1940  | 7640  |      |  |
| 982112 | 1620 | 5  | 329   |       |       |      |  |
| 982112 | 1620 | 6  | 2400  | 175   | 398   |      |  |
| 982112 | 1620 | 7  | 1990  |       |       |      |  |
| 982112 | 1620 | 8  | 1730  | 587   | 2710  |      |  |
| 982112 | 1620 | 9  | 987   |       |       |      |  |
| 982112 | 1620 | 11 | 1     |       |       |      |  |
| 982112 | 1620 | 12 | 3390  | 2390  | 2220  |      |  |
| 982112 | 1622 | 1  | 943   | 7260  |       |      |  |
| 982112 | 1622 | 2  | 1930  | 3150  |       |      |  |
| 982112 | 1622 | 3  | 6010  | 3080  |       |      |  |
| 982112 | 1622 | 4  | 7000  | 20000 |       |      |  |
| 982112 | 1622 | 5  | 5040  | 2730  | 14500 |      |  |
| 982112 | 1622 | 6  | 785   | 8390  | 15000 |      |  |
| 982112 | 1622 | 7  | 20800 | 19000 | 955   |      |  |
| 982112 | 1622 | 8  | 11500 | 36600 | 1270  |      |  |
| 982112 | 1622 | 9  | 2360  | 5790  | 14000 |      |  |
| 982112 | 1622 | 10 | 3350  | 4340  |       |      |  |
| 982112 | 1622 | 12 | 8750  | 2730  |       |      |  |
| 982112 | 1626 | 1  | 1     | 601   | 1090  |      |  |
| 982112 | 1626 | 2  | 253   | 406   |       |      |  |
| 982112 | 1626 | 3  | 949   | 534   |       |      |  |
| 982112 | 1626 | 4  | 832   | 196   |       |      |  |
| 982112 | 1626 | 5  | 201   | 72.2  | 101   |      |  |
| 982112 | 1626 | 6  | 409   | 539   |       |      |  |
| 982112 | 1626 | 7  |       | 379   |       |      |  |
| 982112 | 1626 | 8  | 380   |       |       |      |  |
| 982112 | 1626 | 9  | 564   |       |       |      |  |
| 982112 | 1626 | 10 | 22.9  | 263   |       |      |  |
| 982112 | 1626 | 11 | 917   |       |       |      |  |
| 982112 | 1626 | 12 |       | 1     |       |      |  |
| 982112 | 1630 | 1  | 12.1  | 2220  | 2530  |      |  |
| 982112 | 1630 | 2  | 1320  | 398   | 1280  |      |  |

|        |      |    |      |      |      |      |  |
|--------|------|----|------|------|------|------|--|
| 982112 | 1630 | 3  | 47.5 | 108  |      |      |  |
| 982112 | 1630 | 4  | 1150 | 133  | 1100 |      |  |
| 982112 | 1630 | 5  | 841  | 285  | 3270 |      |  |
| 982112 | 1630 | 6  | 165  | 431  |      |      |  |
| 982112 | 1630 | 7  | 1    | 1    | 125  |      |  |
| 982112 | 1630 | 8  | 1360 | 203  |      |      |  |
| 982112 | 1630 | 9  | 17   | 972  | 74.9 |      |  |
| 982112 | 1630 | 10 | 831  | 1090 | 26.5 |      |  |
| 982112 | 1630 | 11 | 609  | 93.5 | 1030 |      |  |
| 982112 | 1630 | 12 | 51.2 | 3040 | 65.5 |      |  |
| 982112 | 1631 | 1  | 8.77 |      |      |      |  |
| 982112 | 1631 | 2  | 1520 | 379  | 52.2 |      |  |
| 982112 | 1631 | 3  | 78.1 |      |      |      |  |
| 982112 | 1631 | 4  | 369  |      |      |      |  |
| 982112 | 1631 | 5  | 29.4 |      |      |      |  |
| 982112 | 1631 | 6  | 13.9 | 14.9 | 122  |      |  |
| 982112 | 1631 | 7  | 456  | 536  |      |      |  |
| 982112 | 1631 | 8  | 199  | 358  |      |      |  |
| 982112 | 1631 | 9  | 1410 | 619  |      |      |  |
| 982112 | 1631 | 10 | 446  | 6.11 |      |      |  |
| 982112 | 1631 | 11 | 19.6 |      |      |      |  |
| 982112 | 1631 | 12 | 463  | 76   | 12.9 |      |  |
| 982112 | 1633 | 1  | 1    | 1090 | 485  |      |  |
| 982112 | 1633 | 2  | 1580 | 112  |      |      |  |
| 982112 | 1633 | 3  | 1520 | 351  |      |      |  |
| 982112 | 1633 | 4  | 1090 | 186  |      |      |  |
| 982112 | 1633 | 5  | 439  |      |      |      |  |
| 982112 | 1633 | 6  | 215  | 67.2 |      |      |  |
| 982112 | 1633 | 7  | 364  |      |      |      |  |
| 982112 | 1633 | 8  | 1780 | 207  | 15.8 |      |  |
| 982112 | 1633 | 9  | 257  | 1310 |      |      |  |
| 982112 | 1633 | 10 | 219  | 1460 |      |      |  |
| 982112 | 1633 | 12 |      | 1    | 652  |      |  |
| 982112 | 1635 | 1  | 1    | 1180 | 632  |      |  |
| 982112 | 1635 | 2  | 5130 |      |      |      |  |
| 982112 | 1635 | 3  | 139  | 427  |      |      |  |
| 982112 | 1635 | 4  | 1630 | 142  |      |      |  |
| 982112 | 1635 | 5  | 525  | 297  |      |      |  |
| 982112 | 1635 | 6  |      | 950  | 257  | 1820 |  |
| 982112 | 1635 | 7  | 2670 | 692  |      |      |  |
| 982112 | 1635 | 8  | 1710 | 1740 |      |      |  |
| 982112 | 1635 | 9  | 707  |      |      |      |  |
| 982112 | 1635 | 10 | 124  |      |      |      |  |
| 982112 | 1635 | 11 | 1070 | 3740 | 3390 |      |  |
| 982112 | 1635 | 12 |      | 22.7 | 20.9 |      |  |
| 982112 | 1636 | 1  | 1    | 2430 |      |      |  |
| 982112 | 1636 | 2  | 5.99 |      |      |      |  |
| 982112 | 1636 | 3  | 169  |      |      |      |  |
| 982112 | 1636 | 4  | 1350 | 877  |      |      |  |
| 982112 | 1636 | 5  | 764  | 2380 |      |      |  |
| 982112 | 1636 | 6  | 395  | 1540 | 1300 |      |  |
| 982112 | 1636 | 7  | 45.7 | 2850 | 31.9 |      |  |
| 982112 | 1636 | 8  | 47.9 | 9.56 |      |      |  |
| 982112 | 1636 | 9  | 256  | 1320 | 341  |      |  |
| 982112 | 1636 | 10 | 2460 | 157  |      |      |  |

|        |      |    |      |      |      |      |  |
|--------|------|----|------|------|------|------|--|
| 982112 | 1636 | 11 | 239  | 64.8 | 11.8 |      |  |
| 982112 | 1636 | 12 |      | 3230 | 463  | 35.1 |  |
| 982112 | 1638 | 1  | 1    | 148  |      |      |  |
| 982112 | 1638 | 2  | 739  |      |      |      |  |
| 982112 | 1638 | 3  | 1330 |      |      |      |  |
| 982112 | 1638 | 4  | 2440 |      |      |      |  |
| 982112 | 1638 | 5  | 5360 |      |      |      |  |
| 982112 | 1638 | 6  | 22.5 |      |      |      |  |
| 982112 | 1638 | 7  | 651  | 3340 |      |      |  |
| 982112 | 1638 | 8  | 7280 | 2700 |      |      |  |
| 982112 | 1638 | 9  | 3020 |      |      |      |  |
| 982112 | 1638 | 10 | 553  |      |      |      |  |
| 982112 | 1638 | 11 | 120  | 298  |      |      |  |
| 982112 | 1638 | 12 | 2350 | 68.5 |      |      |  |
| 982113 | 2004 | 1  | 1    | 142  | 13.1 |      |  |
| 982113 | 2004 | 2  | 1    | 1    | 1    |      |  |
| 982113 | 2004 | 3  | 1    | 1    |      |      |  |
| 982113 | 2004 | 4  | 1    | 1    | 1    |      |  |
| 982113 | 2004 | 5  | 1    | 1    | 1    |      |  |
| 982113 | 2004 | 6  | 1    | 1    |      |      |  |
| 982113 | 2004 | 7  | 79.3 | 360  |      |      |  |
| 982113 | 2004 | 8  | 1    | 178  | 5.14 |      |  |
| 982113 | 2004 | 9  | 1    | 1    | 1    |      |  |
| 982113 | 2004 | 10 | 1    | 1    |      |      |  |
| 982113 | 2004 | 11 | 1    |      |      |      |  |
| 982113 | 2004 | 12 | 29.7 | 132  | 3150 |      |  |
| 982113 | 2008 | 1  | 1    |      |      |      |  |
| 982113 | 2013 | 1  | 1    |      |      |      |  |
| 982113 | 2013 | 2  | 17.1 |      |      |      |  |
| 982113 | 2013 | 5  | 1220 |      |      |      |  |
| 982113 | 2013 | 6  | 291  |      |      |      |  |
| 982113 | 2016 | 1  | 1    | 223  |      |      |  |
| 982113 | 2016 | 2  | 127  | 662  | 393  |      |  |
| 982113 | 2016 | 3  | 29   | 137  | 989  |      |  |
| 982113 | 2016 | 4  | 1320 | 902  | 125  |      |  |
| 982113 | 2016 | 5  | 344  | 829  | 558  |      |  |
| 982113 | 2016 | 6  | 109  | 1270 | 473  |      |  |
| 982113 | 2016 | 7  | 1240 | 220  | 274  |      |  |
| 982113 | 2016 | 8  | 64.7 | 364  |      |      |  |
| 982113 | 2016 | 9  | 10.4 | 452  | 155  |      |  |
| 982113 | 2016 | 10 | 14.7 |      |      |      |  |
| 982113 | 2016 | 11 | 317  | 310  | 755  |      |  |
| 982113 | 2016 | 12 | 326  | 158  | 233  |      |  |
| 982113 | 2017 | 1  | 1    | 658  | 1340 |      |  |
| 982113 | 2017 | 2  | 3300 | 1750 |      |      |  |
| 982113 | 2017 | 3  | 71.3 | 292  | 1720 |      |  |
| 982113 | 2017 | 4  | 1310 | 4130 | 169  |      |  |
| 982113 | 2017 | 5  | 2230 | 75.8 | 2040 |      |  |
| 982113 | 2017 | 6  | 2950 | 365  |      |      |  |
| 982113 | 2017 | 7  | 4890 | 7160 | 4100 |      |  |
| 982113 | 2017 | 8  | 4090 | 3770 | 982  |      |  |
| 982113 | 2017 | 9  | 939  | 4480 | 1650 |      |  |
| 982113 | 2017 | 10 | 1520 | 5970 |      |      |  |
| 982113 | 2017 | 11 | 3140 | 363  |      |      |  |
| 982113 | 2017 | 12 | 7910 | 8660 | 3270 |      |  |

|        |      |    |      |       |      |  |  |
|--------|------|----|------|-------|------|--|--|
| 982113 | 2018 | 1  | 1    | 475   | 4470 |  |  |
| 982113 | 2018 | 2  | 1    |       |      |  |  |
| 982113 | 2018 | 3  | 1    |       |      |  |  |
| 982113 | 2020 | 1  | 1    | 1870  |      |  |  |
| 982113 | 2020 | 2  | 382  |       |      |  |  |
| 982113 | 2020 | 3  | 153  |       |      |  |  |
| 982113 | 2020 | 4  | 879  |       |      |  |  |
| 982113 | 2020 | 5  | 866  |       |      |  |  |
| 982113 | 2020 | 6  | 823  | 229   |      |  |  |
| 982113 | 2025 | 1  | 1    | 41.4  | 1    |  |  |
| 982113 | 2025 | 2  | 1    | 5.51  | 1    |  |  |
| 982113 | 2025 | 3  | 1    | 1     | 1    |  |  |
| 982113 | 2025 | 4  | 1    | 1     | 1    |  |  |
| 982113 | 2025 | 5  | 1    | 1     | 1    |  |  |
| 982113 | 2025 | 6  | 1    | 1760  | 1120 |  |  |
| 982113 | 2025 | 7  | 42   | 112   | 1    |  |  |
| 982113 | 2025 | 8  | 1    | 1     | 1    |  |  |
| 982113 | 2025 | 9  | 1    | 1     | 325  |  |  |
| 982113 | 2025 | 10 | 5.25 | 1     | 1    |  |  |
| 982113 | 2025 | 11 | 1    | 1     | 239  |  |  |
| 982113 | 2025 | 12 | 8.81 | 1     | 1    |  |  |
| 982113 | 2028 | 1  | 1    | 15.2  | 1    |  |  |
| 982113 | 2028 | 2  | 1    | 1     | 1    |  |  |
| 982113 | 2028 | 3  | 1    |       |      |  |  |
| 982113 | 2028 | 4  | 1    | 1     |      |  |  |
| 982113 | 2028 | 5  | 1    |       |      |  |  |
| 982113 | 2028 | 6  | 1    | 1     |      |  |  |
| 982113 | 2028 | 7  | 1    | 1     | 1    |  |  |
| 982113 | 2028 | 8  | 1    | 1     | 1    |  |  |
| 982113 | 2028 | 9  | 1    | 1     | 1    |  |  |
| 982113 | 2028 | 11 | 1    |       |      |  |  |
| 982113 | 2028 | 12 | 1    |       |      |  |  |
| 982113 | 2030 | 1  | 1    | 69.9  | 1230 |  |  |
| 982113 | 2030 | 2  | 4520 | 710   | 944  |  |  |
| 982113 | 2030 | 3  | 4820 | 287   | 2120 |  |  |
| 982113 | 2030 | 4  | 102  | 530   | 134  |  |  |
| 982113 | 2030 | 5  | 514  | 1070  | 91.6 |  |  |
| 982113 | 2030 | 6  | 69.8 | 172   | 191  |  |  |
| 982113 | 2030 | 7  | 341  | 795   | 122  |  |  |
| 982113 | 2030 | 8  | 1390 | 167   | 1260 |  |  |
| 982113 | 2030 | 9  | 291  | 200   |      |  |  |
| 982113 | 2030 | 10 | 1090 | 114   |      |  |  |
| 982113 | 2030 | 11 |      | 56.4  | 49   |  |  |
| 982113 | 2030 | 12 | 1    | 1     | 1    |  |  |
| 982113 | 2032 | 1  | 1    | 16.9  |      |  |  |
| 982113 | 2032 | 2  | 38.6 | 1     | 1    |  |  |
| 982113 | 2032 | 3  | 1    | 1     | 1    |  |  |
| 982113 | 2034 | 1  | 1    | 418   | 1440 |  |  |
| 982113 | 2034 | 2  | 474  |       |      |  |  |
| 982113 | 2039 | 1  | 1    | 1     | 221  |  |  |
| 982113 | 2039 | 2  | 6110 | 734   | 5560 |  |  |
| 982113 | 2039 | 3  | 442  | 1180  |      |  |  |
| 982113 | 2043 | 1  | 1    | 288   |      |  |  |
| 982113 | 2043 | 2  | 1190 |       |      |  |  |
| 982113 | 2043 | 3  | 2930 | 57100 |      |  |  |

|        |      |    |      |      |       |      |  |
|--------|------|----|------|------|-------|------|--|
| 982113 | 2044 | 1  | 1    | 1    | 1     |      |  |
| 982113 | 2044 | 2  | 1    | 1    |       |      |  |
| 982113 | 2044 | 3  | 1    |      |       |      |  |
| 982117 | 0401 | 1  |      |      | 3300  | 5750 |  |
| 982117 | 0401 | 2  | 26.2 | 284  |       |      |  |
| 982117 | 0401 | 3  |      |      |       |      |  |
| 982117 | 0401 | 4  | 1560 |      | 737   |      |  |
| 982117 | 0401 | 5  | 369  |      |       |      |  |
| 982117 | 0401 | 6  | 1    |      |       |      |  |
| 982117 | 0401 | 7  |      |      |       |      |  |
| 982117 | 0401 | 8  | 2930 |      |       |      |  |
| 982117 | 0401 | 9  | 592  | 252  |       |      |  |
| 982117 | 0401 | 10 | 36.8 | 10.5 |       |      |  |
| 982117 | 0403 | 1  | 1    |      |       |      |  |
| 982117 | 0403 | 2  | 16.2 | 7340 | 15.3  |      |  |
| 982117 | 0403 | 3  | 1470 |      |       |      |  |
| 982117 | 0403 | 4  | 8950 | 541  |       |      |  |
| 982117 | 0403 | 5  | 2290 | 6350 | 10700 |      |  |
| 982117 | 0403 | 6  | 850  |      |       |      |  |
| 982117 | 0403 | 7  |      | 6320 | 92.8  |      |  |
| 982117 | 0403 | 8  | 2980 | 2390 |       |      |  |
| 982117 | 0403 | 9  | 5920 | 711  | 1290  |      |  |
| 982117 | 0403 | 10 | 3910 |      |       |      |  |
| 982117 | 0403 | 11 | 868  | 1320 | 930   |      |  |
| 982117 | 0403 | 12 | 225  | 2120 |       |      |  |
| 982117 | 0405 | 1  |      | 1    | 1     |      |  |
| 982117 | 0405 | 2  | 1    |      |       |      |  |
| 982117 | 0406 | 1  | 1    | 1    |       |      |  |
| 982117 | 0406 | 2  | 1    | 1    |       |      |  |
| 982117 | 0406 | 3  | 1    | 1    |       |      |  |
| 982117 | 0406 | 4  | 1    | 1    |       |      |  |
| 982117 | 0406 | 5  | 1    | 1    | 1     |      |  |
| 982117 | 0406 | 6  | 1    |      |       |      |  |
| 982117 | 0406 | 7  |      | 1    |       |      |  |
| 982117 | 0406 | 8  | 1    |      |       |      |  |
| 982117 | 0406 | 9  | 1    | 1    | 1     |      |  |
| 982117 | 0406 | 10 | 1    | 1    |       |      |  |
| 982117 | 0406 | 11 | 1    | 1    |       |      |  |
| 982117 | 0406 | 12 |      | 1    | 1     | 1    |  |
| 982117 | 0419 | 1  | 1    | 69.7 | 56.3  |      |  |
| 982117 | 0419 | 2  |      | 293  |       |      |  |
| 982117 | 0419 | 3  | 235  | 47.8 |       |      |  |
| 982117 | 0419 | 4  | 175  | 706  |       |      |  |
| 982117 | 0419 | 5  | 332  | 85   |       |      |  |
| 982117 | 0419 | 6  |      | 386  | 181   |      |  |
| 982117 | 0419 | 7  | 1040 | 71.3 | 218   |      |  |
| 982117 | 0419 | 8  | 328  | 69.3 |       |      |  |
| 982117 | 0419 | 9  | 210  | 75.1 | 17.2  |      |  |
| 982117 | 0419 | 10 | 467  | 173  |       |      |  |
| 982117 | 0419 | 11 | 81.9 | 249  | 282   |      |  |
| 982117 | 0419 | 12 | 114  | 118  | 131   |      |  |
| 982121 | 0800 | 1  | 13.2 | 1    | 7.42  |      |  |
| 982121 | 0800 | 2  | 1    | 21.6 |       |      |  |
| 982121 | 0800 | 3  | 41.5 | 1    |       |      |  |
| 982121 | 0800 | 5  | 1    |      |       |      |  |

|        |      |    |       |      |      |      |  |
|--------|------|----|-------|------|------|------|--|
| 982121 | 0800 | 7  | 1     |      |      |      |  |
| 982121 | 0833 | 1  | 1     | 2150 | 2430 |      |  |
| 982121 | 0833 | 2  | 2230  | 1970 |      |      |  |
| 982121 | 0833 | 3  | 1670  | 1880 | 2460 |      |  |
| 982121 | 0833 | 4  | 34    |      |      |      |  |
| 982121 | 0833 | 5  | 10.4  |      |      |      |  |
| 982121 | 0843 | 1  | 1     | 2980 | 3860 |      |  |
| 982121 | 0843 | 2  | 1100  | 251  | 797  |      |  |
| 982121 | 0843 | 3  | 2820  | 481  | 361  |      |  |
| 982121 | 0843 | 4  | 44.3  | 2090 | 1730 |      |  |
| 982121 | 0843 | 5  |       | 349  | 3010 | 571  |  |
| 982121 | 0843 | 6  | 747   | 1430 | 130  |      |  |
| 982121 | 0843 | 7  | 2180  | 2250 | 1840 |      |  |
| 982121 | 0843 | 8  | 1700  | 3090 | 3670 |      |  |
| 982121 | 0843 | 9  | 417   | 391  | 269  |      |  |
| 982121 | 0843 | 10 | 1010  | 1930 | 48   |      |  |
| 982121 | 0843 | 11 | 1370  | 1660 | 344  |      |  |
| 982121 | 0843 | 12 |       | 170  | 412  | 264  |  |
| 982121 | 0875 | 1  | 120   | 149  | 751  |      |  |
| 982121 | 0875 | 2  | 11100 | 1330 | 6340 |      |  |
| 982121 | 0875 | 3  | 1840  | 168  | 186  |      |  |
| 982121 | 0875 | 4  | 1080  | 94.7 | 1600 |      |  |
| 982121 | 0875 | 5  | 637   | 4550 | 904  |      |  |
| 982121 | 0875 | 6  | 301   | 425  | 299  |      |  |
| 982121 | 0875 | 7  | 326   | 1810 | 226  |      |  |
| 982121 | 0875 | 8  | 2340  | 986  | 3780 |      |  |
| 982121 | 0875 | 9  | 2960  | 2610 | 1920 |      |  |
| 982121 | 0875 | 10 | 56.6  | 1200 | 673  |      |  |
| 982121 | 0875 | 11 | 932   | 886  | 2060 |      |  |
| 982121 | 0875 | 12 |       | 895  | 4090 | 2370 |  |
| 982121 | 0881 | 1  | 1     | 253  |      |      |  |
| 982121 | 0881 | 2  | 365   | 47.4 | 885  |      |  |
| 982121 | 0881 | 3  | 107   | 673  |      |      |  |
| 982121 | 0881 | 4  | 619   | 425  |      |      |  |
| 982121 | 0881 | 5  | 149   |      |      |      |  |
| 982121 | 0881 | 6  |       | 10.7 | 40.3 | 89.6 |  |
| 982121 | 0881 | 7  | 61.6  | 1660 |      |      |  |
| 982121 | 0881 | 8  | 568   | 367  |      |      |  |
| 982121 | 0881 | 9  | 59.2  | 413  | 32   |      |  |
| 982121 | 0881 | 10 | 1260  |      |      |      |  |
| 982121 | 0881 | 11 | 450   | 49.1 |      |      |  |
| 982121 | 0881 | 12 | 582   | 4130 |      |      |  |
| 982121 | 0884 | 1  | 1     | 437  | 439  |      |  |
| 982121 | 0884 | 2  | 103   | 2680 | 303  |      |  |
| 982121 | 0884 | 3  | 659   | 647  | 2540 |      |  |
| 982121 | 0884 | 4  | 884   | 2770 | 2560 |      |  |
| 982121 | 0884 | 5  | 798   | 568  | 3700 |      |  |
| 982121 | 0884 | 6  |       | 1660 | 997  | 63.1 |  |
| 982121 | 0884 | 7  | 1     | 1    | 1    |      |  |
| 982121 | 0884 | 8  | 1     | 1    | 1    |      |  |
| 982121 | 0884 | 9  | 1     | 1    | 1    |      |  |
| 982121 | 0884 | 10 | 1     | 1    | 1    |      |  |
| 982121 | 0884 | 11 | 1     | 1    | 1    |      |  |
| 982121 | 0884 | 12 | 1     | 1    | 1    |      |  |
| 982123 | 2203 | 1  | 1     | 7560 |      |      |  |

|        |      |    |       |      |      |     |  |
|--------|------|----|-------|------|------|-----|--|
| 982123 | 2203 | 2  | 2730  |      |      |     |  |
| 982123 | 2203 | 3  | 2770  | 1000 |      |     |  |
| 982123 | 2203 | 4  | 7330  |      |      |     |  |
| 982123 | 2203 | 5  | 6460  |      |      |     |  |
| 982123 | 2203 | 6  |       | 469  |      |     |  |
| 982123 | 2203 | 7  | 5530  | 1520 |      |     |  |
| 982123 | 2205 | 1  | 1     | 2930 |      |     |  |
| 982123 | 2205 | 2  | 106   | 283  | 50.5 |     |  |
| 982123 | 2205 | 3  | 920   | 110  | 720  |     |  |
| 982123 | 2205 | 4  | 115   | 37.6 | 244  |     |  |
| 982123 | 2205 | 5  | 3950  | 78.2 | 103  |     |  |
| 982123 | 2205 | 6  |       | 227  |      |     |  |
| 982123 | 2205 | 7  | 1760  | 71.3 | 30.2 |     |  |
| 982123 | 2205 | 8  | 109   | 59.5 | 30.3 |     |  |
| 982123 | 2205 | 9  | 401   | 193  |      |     |  |
| 982123 | 2205 | 10 | 1200  | 3.53 | 118  |     |  |
| 982123 | 2205 | 11 | 2790  | 1    |      |     |  |
| 982123 | 2205 | 12 | 48.9  | 1860 |      |     |  |
| 982123 | 2208 | 1  | 1     | 2850 | 1180 |     |  |
| 982123 | 2208 | 2  | 3540  | 504  | 550  |     |  |
| 982123 | 2208 | 3  | 174   | 1770 |      |     |  |
| 982123 | 2208 | 4  | 24.8  | 173  |      |     |  |
| 982123 | 2208 | 5  | 6970  |      |      |     |  |
| 982123 | 2208 | 6  | 10300 | 2100 |      |     |  |
| 982123 | 2208 | 7  |       | 270  | 2020 |     |  |
| 982123 | 2208 | 8  | 1850  | 7420 | 818  |     |  |
| 982123 | 2208 | 9  | 11100 | 2180 |      |     |  |
| 982123 | 2208 | 10 | 781   | 1080 | 3080 |     |  |
| 982123 | 2208 | 11 | 2630  | 3670 | 1720 |     |  |
| 982123 | 2208 | 12 |       | 4390 | 6710 |     |  |
| 982123 | 2211 | 1  | 1     | 1300 | 2540 |     |  |
| 982123 | 2211 | 2  | 801   | 353  |      |     |  |
| 982123 | 2211 | 3  | 614   |      |      |     |  |
| 982123 | 2211 | 4  | 121   | 792  |      |     |  |
| 982123 | 2211 | 5  | 116   | 263  | 60.4 |     |  |
| 982123 | 2211 | 6  |       | 61.7 | 1380 | 360 |  |
| 982123 | 2211 | 7  | 3180  |      |      |     |  |
| 982123 | 2211 | 8  | 1520  | 615  |      |     |  |
| 982123 | 2211 | 10 | 11.5  | 628  |      |     |  |
| 982123 | 2211 | 11 | 68.9  |      |      |     |  |
| 982123 | 2211 | 12 | 1     | 1    |      |     |  |
| 982123 | 2214 | 1  | 1     | 801  | 4550 |     |  |
| 982123 | 2214 | 2  | 1500  | 1990 | 4420 |     |  |
| 982123 | 2214 | 3  | 2890  | 1130 |      |     |  |
| 982123 | 2214 | 4  | 2650  | 594  | 2860 |     |  |
| 982123 | 2214 | 5  | 1670  | 7950 |      |     |  |
| 982123 | 2214 | 6  |       | 11.4 | 3090 |     |  |
| 982123 | 2214 | 7  | 99.8  |      |      |     |  |
| 982123 | 2214 | 8  | 3320  | 186  | 595  |     |  |
| 982123 | 2214 | 9  | 465   | 1070 | 534  |     |  |
| 982123 | 2214 | 10 | 220   | 332  |      |     |  |
| 982123 | 2214 | 11 | 3740  | 2140 |      |     |  |
| 982123 | 2214 | 12 | 85.3  |      |      |     |  |
| 982123 | 2215 | 1  | 1     | 1030 |      |     |  |
| 982123 | 2215 | 2  | 2090  | 5880 |      |     |  |



|        |      |    |       |       |      |  |  |
|--------|------|----|-------|-------|------|--|--|
| 982123 | 2215 | 3  | 12400 | 1520  |      |  |  |
| 982123 | 2215 | 4  | 19000 | 12.1  |      |  |  |
| 982123 | 2215 | 5  | 2390  | 12.2  |      |  |  |
| 982123 | 2215 | 6  | 449   |       |      |  |  |
| 982123 | 2215 | 7  |       | 566   | 10.9 |  |  |
| 982123 | 2215 | 8  | 4380  | 201   |      |  |  |
| 982123 | 2215 | 9  | 6880  | 11700 |      |  |  |
| 982123 | 2215 | 10 | 614   | 2820  | 4270 |  |  |
| 982123 | 2215 | 11 | 9550  | 23000 |      |  |  |
| 982123 | 2215 | 12 | 10300 | 422   |      |  |  |
| 982123 | 2222 | 1  | 1     | 492   | 340  |  |  |
| 982123 | 2222 | 2  | 4040  | 563   |      |  |  |
| 982123 | 2222 | 3  | 7150  |       |      |  |  |
| 982123 | 2222 | 4  | 590   | 1590  |      |  |  |
| 982123 | 2222 | 5  | 1490  | 5480  |      |  |  |
| 982123 | 2222 | 6  |       | 526   | 423  |  |  |
| 982123 | 2222 | 7  | 1030  |       |      |  |  |
| 982123 | 2222 | 8  | 1020  | 312   |      |  |  |
| 982123 | 2222 | 9  | 13600 | 749   |      |  |  |
| 982123 | 2222 | 10 | 316   | 593   |      |  |  |
| 982123 | 2222 | 11 | 141   | 923   |      |  |  |
| 982123 | 2222 | 12 |       | 108   |      |  |  |
|        |      |    |       |       |      |  |  |
|        |      |    |       |       |      |  |  |

## Urine Concentration Time Curves after the last dose of Bupropion

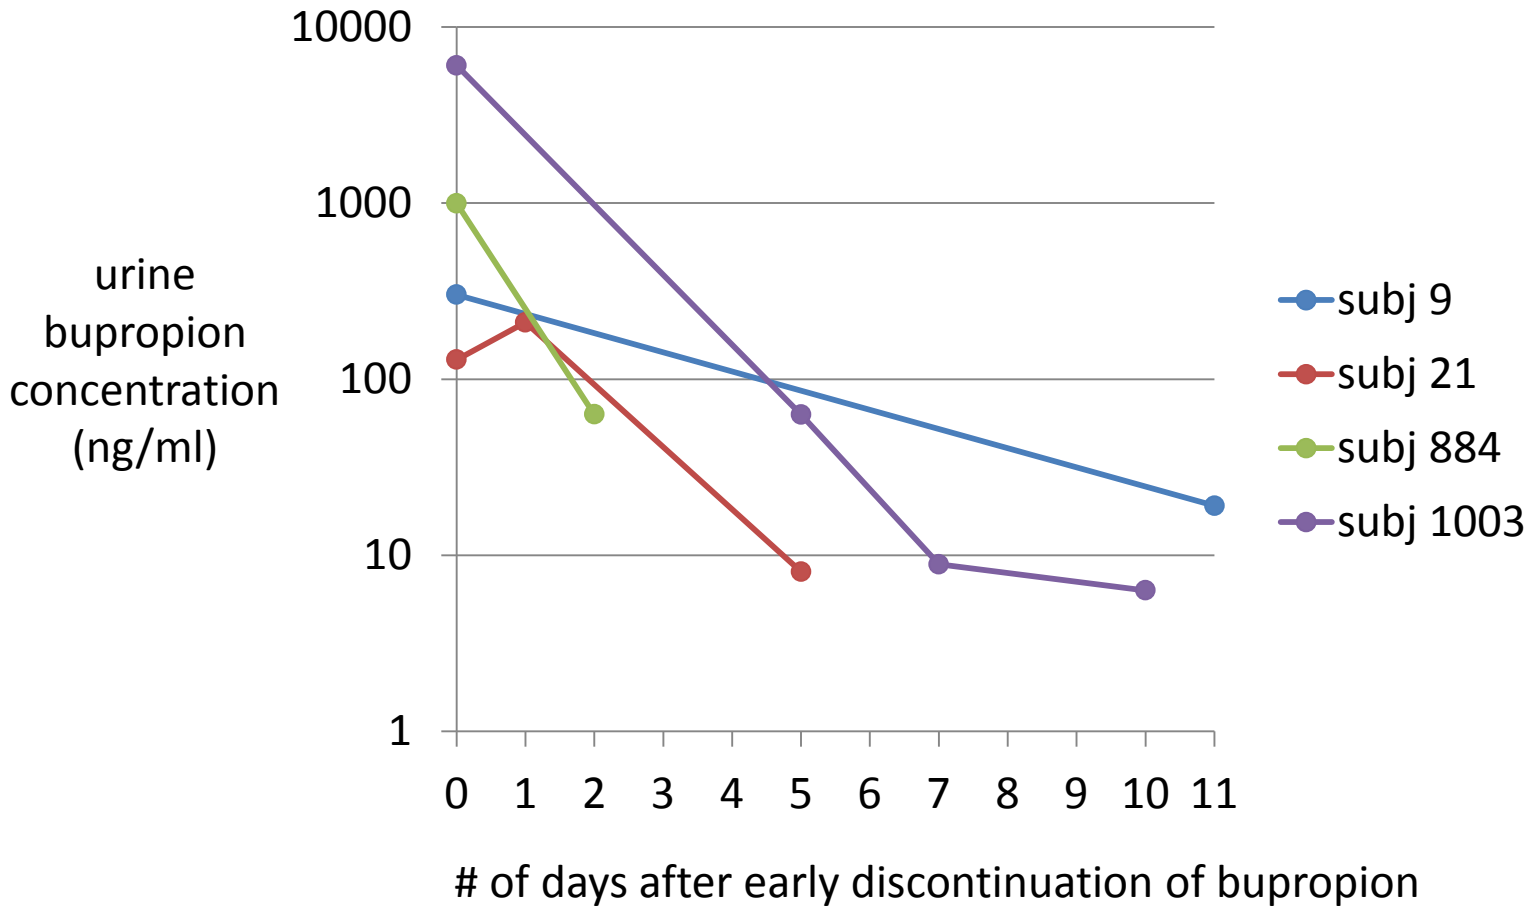

Supplement: NIHMS675709-supplement-2.pdf [file NIHMS675709-supplement-2.pdf]
